# Supplementary material for: CD39 inhibits increased inflammation and promotes resolution of gout
Source: Research Square preprint supplement (doi:10.21203/rs.3.rs-2971283/v1), 2023-05-31
Supplement: Supplementary file 1 [file 01374bbc0efd6404bfb57a92.xlsx]

## Sheet: Sheet1
Supplementary Table S1:Characteristics of Participants
Patient	Age	Gender	Race	Disease duration (years)	Flares within half a year(<6)	Serum uric acid(umol/L)	Tophi present
A1	50	M	Asian	10	√	432
A2	55	M	Asian	1	√	454
A3	36	M	Asian	1	√	518
A4	21	M	Asian	1	√	653
A5	50	M	Asian	1	√	446
A6	25	M	Asian	1	√	459
A7	42	M	Asian	1	√	460
A8	38	M	Asian	5	√	618
A9	39	M	Asian	10	√	421
A10	26	M	Asian	1	√	441
A11	20	M	Asian	1	√	484
A12	47	M	Asian	3	√	508
A13	30	M	Asian	3	√	472
A14	33	M	Asian	5	√	662
A15	44	M	Asian	7	√	488	√
A16	57	M	Asian	1	√	534
A17	31	M	Asian	4	√	555
A18	21	M	Asian	1	√	553
Supplementary Table S1:Characteristics of Participants
