# Supplementary material for: CD39 inhibits increased inflammation and promotes resolution of gout
Source: Research Square preprint supplement (doi:10.21203/rs.3.rs-2971283/v1), 2023-05-31
Supplement: Supplementary file 2 [file 45b24f8cd2cb042161f5c9e3.docx]

**Supplementary Materials Table 2 RT-PCR primers**

| gene | F (5'-3') | R (5'-3') |
| --- | --- | --- |
| rat-Actb | ACCCGCCACCAGTTCGC | CACGATGGAGGGGAAGACG |
| rat-IL1b | TGGCAACTGTCCCTGAACTC | AAGGGCTTGGAAGCAATCCTTA |
| rat-nlrp3 | GTCACCATGGGTTCTGGTCA | GGGCTTAGGTCCACACAGAA |
| rat-casp1 | GAAACGCCATGGCTGACAAG | CATGATCGCACAGGTCTCGT |
| rat-CD39 | CCTGCAACCAGACATGGACT | TAACCACGGCTCAGAAGCTG |
| human-IL1b | TGGCAACTGTCCCTGAACTC | AAGGGCTTGGAAGCAATCCTT​A |
| human-nlrp3 | GATCTTCGCTGCGATCAACAG | CGTGCATTATCTGAACCCCAC |
| human-casp1 | TTTCCGCAAGGTTCGATTTTCA | GGCATCTGCGCTCTACCATC |
| human-CD39 | CCCTCCAGATCCATCGCTTC | AGGGTAGCATTGCTGGTTCC |
| human-gapdh | GGAGCGAGATCCCTCCAAAAT | GGCTGTTGTCATACTTCTCATGG |
|  |  |  |
|  |  |  |
|  |  |  |
|  |  |  |
